# Supplementary material for: Biochemical Evaluation by Confirmatory Tests after Unilateral Adrenalectomy for Primary Aldosteronism
Source: Hindawi journal article supplement (doi:10.1155/2023/5732812), 2023-01-01
Supplement: f1 [file 5732812.f1.pdf]

Supplemental table 1. Characteristics of each patients before Adx

| Clinical outcome | No. | Age at Adx (year) | Female/Male sex | Presence of hypokalemia (Yes/No) | SBP (mmHg) | DBP (mmHg) | Medication (defined daily dose) | eGFR (mL/min/1.73 m <sup>2</sup> ) | Basal PRA (ng/mL.h) | Basal PAC (ng/dL) | Basal ARR | CCT PRA before loading (ng/mL.h) | CCT PAC before loading (ng/dL) | CCT ARR before loading | CCT PAC after loading (ng/dL) | CCT ARR after loading | CCT Ratio of PAC after to before loading (%) | SIT PAC (ng/dL) | FUT PRA (ng/mL.h) | U-Aldo (µg/day) | AVS LR | AVS CR | Tumor detected by CT (Yes/No) |     |
|------------------|-----|-------------------|-----------------|----------------------------------|------------|------------|---------------------------------|------------------------------------|---------------------|-------------------|-----------|----------------------------------|--------------------------------|------------------------|-------------------------------|-----------------------|----------------------------------------------|-----------------|-------------------|-----------------|--------|--------|-------------------------------|-----|
| Complete         | 1   | 51                | Female          | Yes                              | 127        | 75         | 1.3                             | 91.5                               | 0.1                 | 45.1              | 451.0     | 0.2                              | 34.0                           | 170.0                  | 51.6                          | 258.0                 | 151.8                                        | 43.6            | 0.1               | 28.6            | 5.8    | 0.4    | Yes                           |     |
|                  | 2   | 47                | Female          | Yes                              | 124        | 78         | 2.0                             | 111.7                              | 0.1                 | 34.7              | 347.0     | 0.1                              | 20.9                           | 209.0                  | 30.5                          | 305.0                 | 145.9                                        | 33.1            | 0.2               | 18.0            | 33.0   | 0.6    | Yes                           |     |
|                  | 3   | 65                | Male            | Yes                              | 127        | 85         | 1.0                             | 69.0                               | 0.2                 | 33.2              | 166.0     | 0.1                              | 29.0                           | 290.0                  | 27.2                          | 136.0                 | 93.8                                         | 12.2            | 0.2               | 20.2            | 8.5    | 0.3    | Yes                           |     |
|                  | 4   | 73                | Female          | Yes                              | 145        | 84         | 1.4                             | 62.1                               | 0.1                 | 30.6              | 306.0     | NA                               | NA                             | NA                     | NA                            | NA                    | NA                                           | NA              | NA                | 8.3             | 20.3   | 0.2    | Yes                           |     |
|                  | 5   | 32                | Female          | No                               | 145        | 91         | 1.0                             | 103.9                              | 0.3                 | 20.4              | 408.0     | 0.3                              | 17.0                           | 56.7                   | 14.7                          | 52.7                  | 92.4                                         | 7.8             | 0.3               | 11.5            | 4.8    | 1.6    | Yes                           |     |
|                  | 6   | 39                | Male            | No                               | 141        | 80         | 0.0                             | 90.9                               | 0.8                 | 17.3              | 21.6      | 0.2                              | 10.6                           | 53.0                   | 9.0                           | 47.5                  | 84.9                                         | 3.4             | 1.9               | 8.1             | 3.4    | 0.6    | No                            |     |
| Partial          | 7   | 62                | Male            | No                               | 113        | 69         | 2.3                             | 64.5                               | 0.3                 | 11.8              | 46.0      | 0.5                              | 11.8                           | 23.6                   | 9.6                           | 12.6                  | NA                                           | 81.4            | 6.9               | 1.4             | NA     | 1.7    | 0.9                           | No  |
|                  | 8   | 52                | Female          | Yes                              | 112        | 60         | 2.5                             | 64.1                               | 0.3                 | 47.2              | 157.3     | 0.2                              | 41.9                           | 209.5                  | 48.7                          | 454.0                 | 116.2                                        | 37.5            | NA                | 18.3            | 18.2   | 0.3    | Yes                           |     |
|                  | 9   | 59                | Female          | Yes                              | 146        | 94         | 3.1                             | 71.6                               | 0.2                 | 25.1              | 125.5     | 0.2                              | 25.1                           | 125.5                  | 31.1                          | 155.5                 | 123.9                                        | 26.3            | NA                | 17.3            | 220.2  | 0.4    | Yes                           |     |
|                  | 10  | 45                | Male            | No                               | 128        | 72         | 2.0                             | 99.9                               | 0.2                 | 21.3              | 106.5     | 0.3                              | 20.7                           | 69.0                   | 14.0                          | 48.7                  | 67.6                                         | 7.5             | 1.4               | 19.0            | 3.3    | 1.3    | Yes                           |     |
|                  | 11  | 46                | Male            | Yes                              | 145        | 94         | 2.5                             | 113.8                              | 0.3                 | 22.7              | 75.7      | 0.2                              | 38.6                           | 193.0                  | 50.2                          | 251.0                 | 130.1                                        | 17.8            | 0.5               | 15.0            | 28.6   | 0.2    | Yes                           |     |
|                  | 12  | 51                | Female          | No                               | 127        | 87         | 2.0                             | 68.5                               | 0.7                 | 21.1              | 30.1      | 0.6                              | 17.9                           | 29.8                   | 16.6                          | 27.7                  | 92.7                                         | 16.3            | 1.1               | 9.8             | 2.7    | 0.8    | Yes                           |     |
|                  | 13  | 53                | Male            | No                               | 137        | 89         | 2.0                             | 83.5                               | 0.2                 | 16.8              | 84.0      | 0.3                              | 33.5                           | 111.7                  | 23.0                          | 69.0                  | 68.7                                         | 14.0            | NA                | 30.4            | 4.5    | 0.7    | No                            |     |
|                  | 14  | 69                | Female          | No                               | 175        | 86         | 2.7                             | 81.8                               | 0.3                 | 30.5              | 101.7     | 0.3                              | 34.3                           | 114.3                  | 39.7                          | 198.5                 | 115.7                                        | 25.2            | NA                | 13.0            | 3.2    | 0.9    | Yes                           |     |
|                  | 15  | 36                | Female          | No                               | 150        | 92         | 0.7                             | 92.0                               | 0.5                 | 37.2              | 74.4      | 0.3                              | 24.0                           | 80.0                   | 17.2                          | 43.0                  | 71.7                                         | NA              | 0.9               | NA              | 4.9    | 1.5    | No                            |     |
|                  | 16  | 31                | Male            | Yes                              | 161        | 109        | 1.3                             | 85.1                               | 0.4                 | 27.7              | 69.3      | NA                               | NA                             | NA                     | NA                            | NA                    | NA                                           | NA              | 16.0              | NA              | 15.0   | 5.6    | 0.2                           | Yes |

Adx, unilateral adrenalectomy; SBP, systolic blood pressure; DBP, diastolic blood pressure; medication, antihypertensive medication; eGFR, estimated glomerular filtration rate; PRA, plasma renin activity; PAC, plasma aldosterone concentration; ARR, aldosterone-renin ratio; CCT, captopril challenge test; SIT, saline infusion test; FUT, furosemide upright test; U-Aldo, 24 hr urine aldosterone; AVS, adrenal venous sampling; LR, lateralized ratio; CR, contralateral ratio; CT, computed tomography; NA, not available.

Supplemental table 2. Characteristics of each patients after Adx

| Clinical outcome | No. | Adx side (Left/Right) | Histological diagnosis (Adenoma/Cortical nodule) | Post-Adx evaluation time (month) | SBP (mmHg) | DBP (mmHg) | Medication (defined daily dose) | eGFR (mL/min/1.73 m <sup>2</sup> ) | Basal PRA (ng/mL.h) | Basal PAC (ng/dL) | Ratio of PAC (post-Adx to pre-Adx) (%) | Basal ARR | CCT PRA before loading (ng/mL.h) | CCT PAC before loading (ng/dL) | CCT ARR before loading | CCT PAC after loading (ng/dL) | CCT ARR after loading | CCT Ratio of PAC after to before loading (%) | SIT PAC (ng/dL) | FUT PRA (ng/mL.h) | U-Aldo (µg/day) |     |     |
|------------------|-----|-----------------------|--------------------------------------------------|----------------------------------|------------|------------|---------------------------------|------------------------------------|---------------------|-------------------|----------------------------------------|-----------|----------------------------------|--------------------------------|------------------------|-------------------------------|-----------------------|----------------------------------------------|-----------------|-------------------|-----------------|-----|-----|
| Complete         | 1   | Left                  | Adenoma                                          | 4                                | 126        | 81         | 0.0                             | 56.9                               | 0.2                 | 11.9              | 26.4                                   | 59.5      | 0.1                              | 14.6                           | 146.0                  | 9.9                           | 53.0                  | 32.2                                         | 6.8             | 0.7               | 4.3             |     |     |
|                  | 2   | Right                 | Adenoma                                          | 8                                | 123        | 75         | 0.0                             | 94.5                               | 0.4                 | 7.0               | 20.1                                   | 17.5      | 0.1                              | 10.2                           | 102.0                  | 7.9                           | 41.3                  | 22.5                                         | 3.2             | 0.8               | 3.8             |     |     |
|                  | 3   | Left                  | Adenoma                                          | 4                                | 130        | 90         | 0.0                             | 53.6                               | 0.3                 | 5.3               | 16.0                                   | 17.7      | 0.3                              | 6.5                            | 21.7                   | 5.6                           | 14.2                  | <1.0                                         | 0.5             | 0.9               | 0.9             |     |     |
|                  | 4   | Right                 | Adenoma                                          | 4                                | 115        | 65         | 0.0                             | 27.3                               | 1.6                 | 7.5               | 24.6                                   | 4.7       | 1.6                              | 7.5                            | 4.7                    | 6.3                           | 0.5                   | 16.7                                         | 3.0             | NA                | 0.0             | 0.0 |     |
|                  | 5   | Left                  | Adenoma                                          | 7                                | 115        | 72         | 0.0                             | 98.1                               | 0.3                 | 12.9              | 63.2                                   | 43.0      | 0.5                              | 7.6                            | 15.2                   | 7.0                           | 7.0                   | 8.4                                          | <1.0            | 0.1               | 6.9             | 6.8 |     |
|                  | 6   | Right                 | Cortical nodule                                  | 5                                | 112        | 76         | 0.0                             | 98.6                               | 0.7                 | 8.6               | 49.9                                   | 12.3      | 0.9                              | 7.5                            | 8.3                    | 5.7                           | 2.8                   | 23.1                                         | 3.4             | 3.3               | 6.8             | 6.8 |     |
| Partial          | 7   | Left                  | Adenoma                                          | 6                                | 114        | 78         | 1.0                             | 47.3                               | 1.5                 | 8.4               | 61.2                                   | 5.6       | 1.5                              | 8.4                            | 5.6                    | 7.3                           | 2.4                   | 13.2                                         | 4.0             | 1.7               | 7.5             | 7.5 |     |
|                  | 8   | Right                 | Adenoma                                          | 2                                | 101        | 65         | 1.0                             | 55.8                               | 1.0                 | 8.0               | 16.9                                   | 8.0       | 0.8                              | 8.5                            | 10.6                   | 9.8                           | 8.9                   | 15.3                                         | 5.8             | NA                | 0.6             | 0.6 |     |
|                  | 9   | Left                  | Adenoma                                          | 8                                | 143        | 97         | 0.8                             | 50.9                               | 1.1                 | 11.6              | 46.2                                   | 16.5      | 1.0                              | 10.8                           | 10.8                   | 6.5                           | 4.7                   | 39.7                                         | 5.2             | NA                | 5.1             | 5.1 |     |
|                  | 10  | Left                  | Adenoma                                          | 5                                | 117        | 81         | 0.7                             | 89.1                               | 0.4                 | 14.1              | 67.1                                   | 55.8      | 0.2                              | 8.8                            | 44.0                   | 5.9                           | 58.6                  | 33.2                                         | 5.7             | 1.8               | 7.2             | 7.2 |     |
|                  | 11  | Right                 | Adenoma                                          | 3                                | 122        | 69         | 0.5                             | 100.2                              | 0.9                 | 12.8              | 56.4                                   | 14.2      | 0.9                              | 12.8                           | 14.2                   | 12.2                          | 2.1                   | 4.7                                          | 9.6             | 3.9               | 6.3             | 6.3 |     |
|                  | 12  | Left                  | Adenoma                                          | 0                                | 124        | 75         | 0.5                             | 52.1                               | 0.5                 | 12.8              | 60.7                                   | 25.6      | 0.5                              | 12.8                           | 25.6                   | 10.9                          | 18.2                  | 14.8                                         | 4.4             | NA                | 3.1             | 3.1 |     |
|                  | 13  | Left                  | Adenoma                                          | 3                                | 106        | 66         | 0.5                             | 62.1                               | 0.7                 | 24.3              | 144.6                                  | 35.3      | 0.7                              | 24.3                           | 34.7                   | 20.4                          | 13.1                  | 16.0                                         | 7.4             | NA                | 7.9             | 7.9 |     |
|                  | 14  | Left                  | Adenoma                                          | 5                                | 134        | 76         | 2.7                             | 81.8                               | 2.5                 | 15.9              | 52.1                                   | 16.4      | 0.6                              | 9.0                            | 15.0                   | 7.9                           | 17.7                  | 6.9                                          | NA              | 12.7              | 6.9             | 6.2 | 6.2 |
|                  | 15  | Right                 | Cortical nodule                                  | 3                                | 122        | 80         | 0.7                             | 79.4                               | 0.9                 | 16.3              | 43.8                                   | 18.1      | 0.7                              | 11.7                           | 16.7                   | 10.0                          | 7.2                   | 14.9                                         | NA              | 1.6               | 8.0             | 8.0 | 8.0 |
|                  | 16  | Right                 | Adenoma                                          | 8                                | 126        | 76         | 1.3                             | 61.6                               | 1.0                 | 10.8              | 39.0                                   | 10.8      | 1.0                              | 10.8                           | 10.8                   | 9.8                           | 4.4                   | 9.1                                          | 8.6             | 5.5               | 4.3             | 4.3 | 4.3 |

Adx, unilateral adrenalectomy; SBP, systolic blood pressure; DBP, diastolic blood pressure; medication, antihypertensive medication; eGFR, estimated glomerular filtration rate; PRA, plasma renin activity; PAC, plasma aldosterone concentration; ARR, aldosterone-renin ratio; CCT, captopril challenge test; SIT, saline infusion test; FUT, furosemide upright test; U-Aldo, 24 hr urine aldosterone; NA, not available.
